# Supplementary material
Source: HighWire-hosted journal article supplement (https://www.jrheum.org/highwire/filestream/33976/field_highwire_adjunct_files/0/170751DataSuppl.pdf)

ONLINE SUPPLEMENTARY DATA

**Supplementary Table 1.** Immunosuppressive treatments at conception

|         | N  | Primary APS (N=35) | Secondary APS (N=19) | Pred >5 mg/dl (N=4) | HCQ (N=6) | AZA (N=4) |
|---------|----|--------------------|----------------------|---------------------|-----------|-----------|
| aPS/PT+ | 35 | 20                 | 15                   | 4                   | 5         | 3         |
| aPS/PT- | 19 | 15                 | 4                    | 0                   | 1         | 1         |

Pred: prednisone. HCQ: hydroxychloroquine. AZA: azathioprine.

**Supplementary Figure 1.** Study flow diagram.

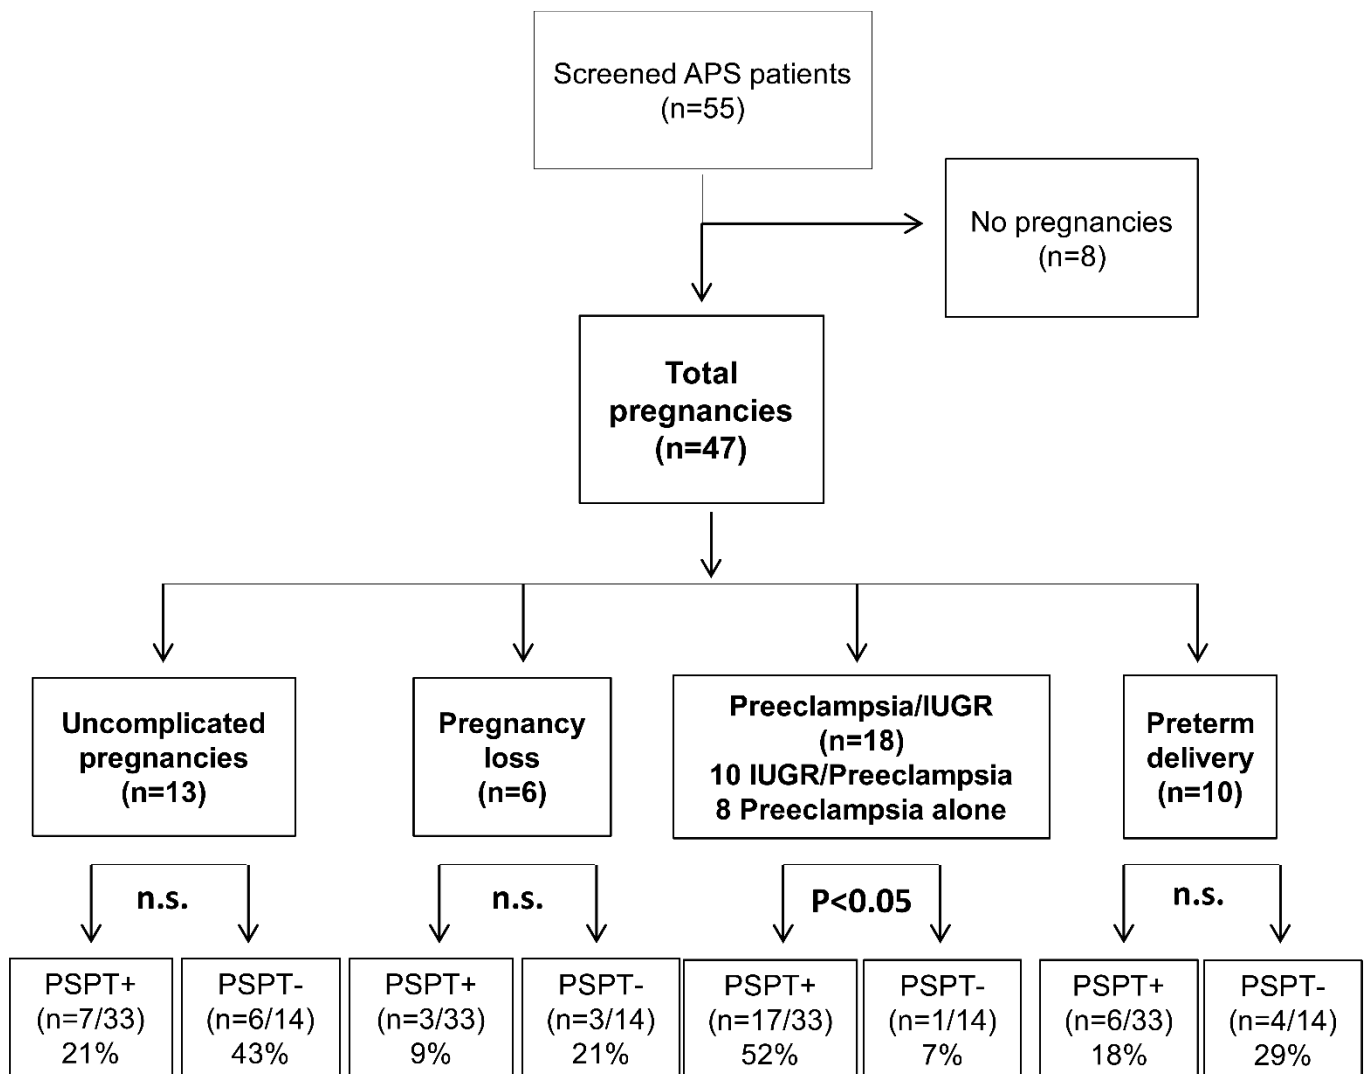

Supplement: 170751DataSuppl.pdf [file 170751DataSuppl.pdf]
